# Supplementary material
Source: MDPI journal article supplement (https://www.mdpi.com/2036-7449/16/1/7)
Supplement: s1 [file s1]

### Search strategy:

**Pubmed:** ("beta-lactams"[All Fields] OR "beta-lactams"[MeSH Terms] OR beta-lactams[Text Word] OR "Carbapenems"[Mesh] OR "Cephalosporins"[Mesh] OR "Monobactams"[Mesh] OR "Penicillins"[Mesh] ) AND ("infusions, subcutaneous"[MeSH Terms] OR "injections, subcutaneous"[MeSH Terms] OR "subcutaneous administration"[text word])

**Scopus:** (beta-lactams OR beta-lactams OR beta-lactams OR Carbapenems OR Cephalosporins OR Monobactams OR Penicillins) AND ("infusions, subcutaneous" OR "injections, subcutaneous" OR "subcutaneous administration")

**Web of Science:** (beta-lactams OR beta-lactams OR beta-lactams OR Carbapenems OR Cephalosporins OR Monobactams OR Penicillins) AND ("infusions, subcutaneous" OR "injections, subcutaneous" OR "subcutaneous administration")
